# Supplementary material
Source: Springer Nature journal article supplement (https://www.springermedizin.de/resource/supplementary/12936_2014_3278_MOESM13_ESM.pdf/9545484)
Supplement: MOESM13 [file 9545484]

*Health-care seeking behavior*

**Outcome assessment**  
**Selection patients**  
**Selection CHWs**  
**Missing data**  
**Other bias**

***n* observations**

|                   |   |   |   |   |   |                                                              |
|-------------------|---|---|---|---|---|--------------------------------------------------------------|
| Elmardi 2009      | - | + | - | ? | + | 48 households pre-, 17 post-study.                           |
| Lemma 2010        | + | + | + | ? | + | 16 RDT CHWs (5123 visits), 17 no RDT CHWs (10457 visits)     |
| Taylor-Smith 2011 | ? | + | ? | ? | + | number of CHWs unclear, 13268 (2004) - 90294 (2005) patients |
